# Supplementary material for: Socioeconomic deprivation and survival after stroke in China: a systematic literature review and a new population-based cohort study
Source: HighWire-hosted journal article supplement (doi:10.1136/bmjopen-2014-005688), 2015-01-01
Supplement: bmjopen-2014-005688supp.pdf [file bmjopen-2014-005688supp.pdf]

**Online Table 1. Quality Assessment for reviewed studies**

| <b>First author of study<br/>(publication year)</b> | <b>1</b> | <b>2</b> | <b>3</b> | <b>4</b> | <b>5</b> | <b>6</b> | <b>7</b> | <b>8</b> | <b>9</b> |
|-----------------------------------------------------|----------|----------|----------|----------|----------|----------|----------|----------|----------|
| Wu GX (1998) <sup>16</sup>                          | ★        | ★        | ★        | ★        | ★        |          | ★        | ★        | ★        |
| Sun JY (2007) <sup>17</sup>                         | ★        | ★        | ★        | ★        |          |          | ★        | ★        |          |
| Liu XD (2007) <sup>18</sup>                         |          | ★        | ★        |          |          |          |          |          | ★        |
| Sheng XP (2010) <sup>19</sup>                       | ★        | ★        |          | ★        |          |          | ★        | ★        | ★        |
| Zhou GY (2006) <sup>20</sup>                        | ★        | ★        | ★        | ★        | ★        | ★        | ★        | ★        | ★        |

1 – Cohort truly representative

2 – Controls derived from the same cohort

3 – Ascertainment of SES (explained and validated)

4 – Outcome of interest not present at start (recurrent stroke cases excluded)

5 – Cohorts controlled for age/sex

6 – Cohorts controlled for other relevant factors

7 – Quality of outcome (mortality) ascertainment

8 – Follow-up duration ( $\geq 28$  days)

9 – Follow-up adequacy (rate of lost to follow up)





**Online Table 2. Socioeconomic status and incidence of stroke in older adults: the Anhui cohort study\***

| Variable                                              | Incident Stroke |      |        |     | p value | Adjusted                           |           |         |
|-------------------------------------------------------|-----------------|------|--------|-----|---------|------------------------------------|-----------|---------|
|                                                       | No              |      | Yes    |     |         | analysis in a Cox regression model |           |         |
|                                                       | n=2678,         | (%)  | n=173, | (%) |         | HR†                                | 95%CI     | p value |
| <b>Educational level</b>                              |                 |      |        |     |         |                                    |           |         |
| >=High 2 <sup>nd</sup> Scho                           | 634             | 95.3 | 31     | 4.7 | 0.339   | Ref                                |           |         |
| Secondary Sch.                                        | 361             | 93.3 | 26     | 6.7 |         | 1.44                               | 0.83-2.49 | 0.191   |
| Primary Sch.                                          | 340             | 94.2 | 21     | 5.8 |         | 1.09                               | 0.57-2.09 | 0.790   |
| Illiterate                                            | 1343            | 93.4 | 95     | 6.6 |         | 1.40                               | 0.74-2.66 | 0.300   |
| <b>Main occupation</b>                                |                 |      |        |     |         |                                    |           |         |
| Official/teacher                                      | 849             | 95.3 | 42     | 4.7 | 0.139   | Ref                                |           |         |
| Manual labourer                                       | 357             | 93.2 | 26     | 6.8 |         | 1.67                               | 0.94-2.99 | 0.082   |
| Peasant                                               | 1263            | 93.6 | 86     | 6.4 |         | 1.49                               | 0.63-3.53 | 0.362   |
| No formal job (including<br>business/other/housewife) | 209             | 91.7 | 19     | 8.3 |         | 1.89                               | 1.04-3.43 | 0.036   |
| <b>Annual income</b>                                  |                 |      |        |     |         |                                    |           |         |
| Very satisfactory                                     | 233             | 92.8 | 18     | 7.2 | 0.408   | 1.16                               | 0.67-2.01 | 0.591   |
| Satisfactory                                          | 902             | 94.5 | 52     | 5.5 |         | Ref                                |           |         |
| Average                                               | 235             | 95.5 | 11     | 4.5 |         | 0.67                               | 0.34-1.32 | 0.243   |
| Poor <sup>§</sup>                                     | 1308            | 93.4 | 92     | 6.6 |         | 0.99                               | 0.47-2.11 | 0.984   |
| <b>Rural/urban living</b>                             |                 |      |        |     |         |                                    |           |         |
| Urban                                                 | 1392            | 94.2 | 85     | 5.8 | 0.468   | Ref                                |           |         |
| Rural                                                 | 1286            | 93.6 | 88     | 6.4 |         | 0.77                               | 0.26-2.23 | 0.626   |

\* in the Anhui cohort, among 2851 participants who were free of stroke at *wave 1* interview and were followed up over 5 years (with a follow-up rate of 89.2%), 173 new cases of stroke were identified from *wave 2* and *wave 3* interviews and from causes of death.

† adjusted for age, sex, waist circumference, smoking status, educational level, occupational class, annual income, rural/urban living, frequency of contacting neighbours, feeling lonely, something severely upsetting in the last 2 years, hypertension and its control, diabetes, and heart disease.

§ anyone who had the serious financial problems in the last 2 years or had the poor income.

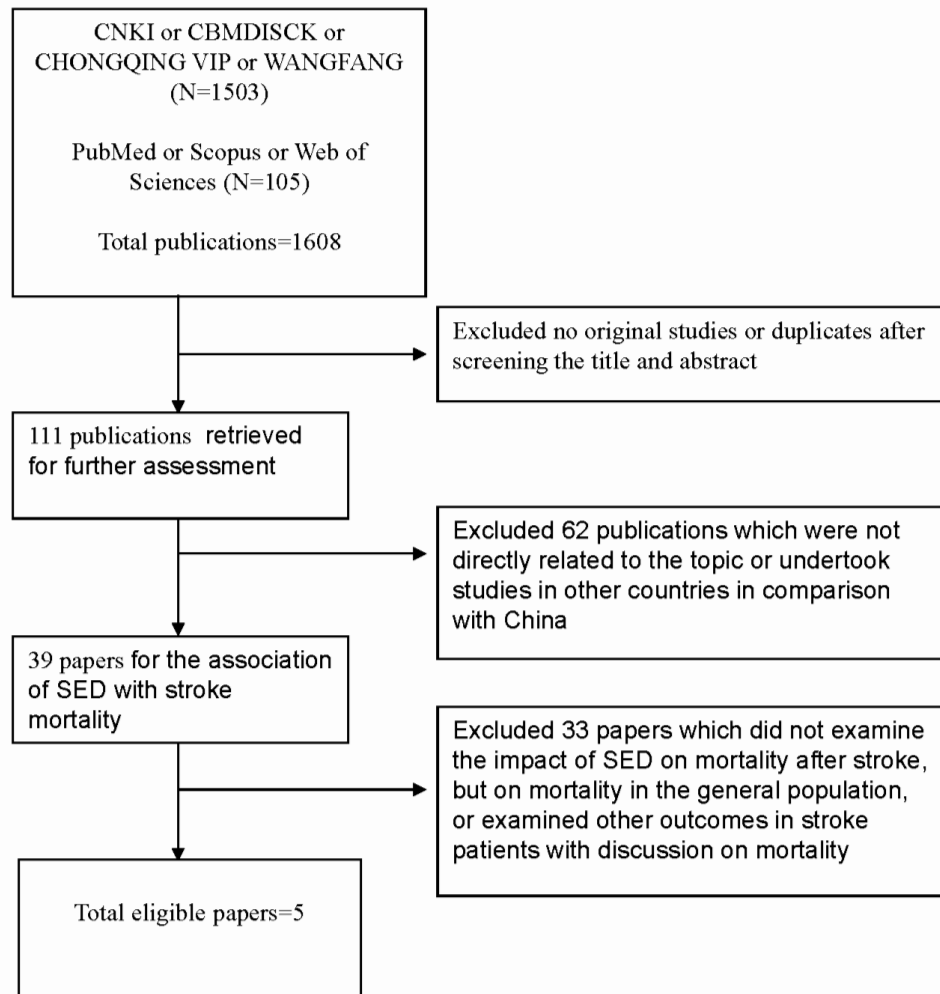

Supplementary Figure 1. Flowchart showing the process of identifying studies for this review
